# Supplementary material
Source: PubMed Central journal article supplement (PMC5649080)
Supplement: blood780155-suppl1.pdf [file blood780155-suppl1.pdf]

**Table S1. Patient characteristics and clinical response to DC vaccination, grouped according to the WT1 construct used.** Responders to WT1/DC vaccination: MR, molecular remission (normalization of *WT1* mRNA levels in blood and/or bone marrow); SD, stable disease (stabilization of increased *WT1* mRNA levels - the duration of SD period is indicated between parentheses); NR, non-responders.

| UPN                | Sex/Age/Cytog. risk                                                              |  | Number of DCs (x10 <sup>6</sup> /dose) |  | Response category | OS / Disease status     |
|--------------------|----------------------------------------------------------------------------------|--|----------------------------------------|--|-------------------|-------------------------|
| 01                 | F/77/int                                                                         |  | 5                                      |  | MR                | Died                    |
| 06                 | M/41/int                                                                         |  | 10                                     |  | MR                | 119.3 mo +/- CR1, alive |
| 08                 | M/33/int                                                                         |  | 20                                     |  | PR → CR & MR      | 116.8 mo +/- CR1, alive |
| 10                 | M/53/fav (inv(16))                                                               |  | 20                                     |  | MR                | 109.4 mo +/- CR1, alive |
| 16                 | F/59/int (t(1;5))                                                                |  | 10                                     |  | PR → CR & MR      | Died                    |
| 02, 03, 05, 07, 09 | Respectively: F/78/int, M/67/adv (complex), F/39/int, M/63/fav (t8;21), M/82/int |  | Respectively: 5, 10, 5, 20, 5          |  | NR (all)          | Died (all)              |

  

| UPN | Sex/<br>Age | WHO type<br>(FAB)/<br>Cytog. risk | Unfavorable prognostic features                                                                                                                                 | Pre-DC<br>treatment          | Status<br>pre-<br>DCs | Time Dx to<br>start DCs | Response<br>category | Treatment post-4 <sup>th</sup> DC vaccination                                                                                                | OS /<br>Disease<br>status                   |
|-----|-------------|-----------------------------------|-----------------------------------------------------------------------------------------------------------------------------------------------------------------|------------------------------|-----------------------|-------------------------|----------------------|----------------------------------------------------------------------------------------------------------------------------------------------|---------------------------------------------|
| 11* | M/62        | AML-mds/<br>int                   | <ul style="list-style-type: none"> <li>Age &gt;60</li> <li>MDS phase pre-AML</li> <li>WT1 mRNA ↑ (post-C)</li> </ul>                                            | I: MICE<br>C: ICE (1x)       | CR1                   | 8.0 mo                  | MR                   | Additional DC vaccines; R1 (51.6 mo post-start WT1/DCs): supportive care                                                                     | 54.0 mo / R1, died                          |
| 12* | F/68        | AML-mds/<br>int                   | <ul style="list-style-type: none"> <li>Age &gt;60</li> <li>MDS phase pre-AML</li> <li>WT1 mRNA ↑ (post-C)</li> </ul>                                            | I: MICE<br>C: ICE (2x)       | CR1                   | 7.7 mo                  | NR                   | R1 (5.0 mo post-start WT1/DCs): HAM (1x); CR2 (6.5 mo post-start WT1/DCs)                                                                    | 99.3 mo +/- CR2, alive                      |
| 15  | F/77        | AML-t(8;21)/<br>fav               | <ul style="list-style-type: none"> <li>Age &gt;60</li> <li>WT1 mRNA ↑ (post-C)</li> </ul>                                                                       | I: MICE<br>RI: HAM<br>C: HAM | CR1                   | 6.3 mo                  | MR                   | Additional WT1/DC vaccines                                                                                                                   | 93.1 mo +/- CR1, alive                      |
| 46  | F/36        | AML-nos<br>(M1)/int               | <ul style="list-style-type: none"> <li>Hyperleukocytosis (WBC 100.10<sup>9</sup>/L)</li> <li>WT1 mRNA ↑ (post-C)</li> <li>No sib donor for allo-HSCT</li> </ul> | I: DCE<br>C: DC (2x)         | CR1                   | 7.7 mo                  | NR                   | R1 (1.4 mo post-start WT1/DCs): I: HAM; PR; RI: HAM; CR2; MUD allo-HSCT                                                                      | 5.2 mo / CR2, died (transplant-related VOD) |
| 47  | M/61        | AML-nos<br>(M5a)/int              | <ul style="list-style-type: none"> <li>Age &gt;60</li> <li>WT1 mRNA ↑ (post-C)</li> </ul>                                                                       | I: ICE<br>C: ICE (2x)        | CR1                   | 7.4 mo                  | NR                   | R1 (3.9 mo post-start WT1/DCs): I & C: HAM; CR2; MUD allo-HSCT                                                                               | 9.5 mo / CR2, died (GVHD)                   |
| 48  | M/74        | AML-nos<br>(M1)/int               | <ul style="list-style-type: none"> <li>Age &gt;60</li> <li>WT1 mRNA ↑ (post-C)</li> </ul>                                                                       | I: DC<br>C: C                | CR1                   | 10.6 mo                 | SD<br>(3.0 mo)       | R1 (4.4 mo post-start WT1/DCs): decitabine (4 cycles); CR2: decitabine (1 cycle); R2 (2.5 mo after CR2; 11 mo post-start WT1/DC): decitabine | 14.0 mo / R2, died                          |

**Table S1A. Patient characteristics and clinical response to vaccination with DCs electroporated with mRNA derived from WT1 construct 1 (“WT1 group”; for details of this construct, see Figure 1).** The first 10 patients described in the upper panel (responders UPN01, 06, 08, 10, 16; non-responders UPN02, 03, 05, 07, 09) were enrolled in NCT0083400211; all other patients in NCT00965224. If not indicated in the table, the patients received 10 x 10<sup>6</sup> DCs/dose.

| UPN | Sex/<br>Age | WHO type<br>(FAB)/<br>Cytog. risk | Unfavorable prognostic features                                                                                                                                           | Pre-DC<br>treatment    | Status<br>pre-<br>DCs | Time Dx to<br>start DCs | Response<br>category | Treatment post-4 <sup>th</sup> DC vaccination                                            | OS /<br>Disease<br>status  |
|-----|-------------|-----------------------------------|---------------------------------------------------------------------------------------------------------------------------------------------------------------------------|------------------------|-----------------------|-------------------------|----------------------|------------------------------------------------------------------------------------------|----------------------------|
| 13* | M/69        | AML-nos<br>(M5b)/int<br>(+11)     | <ul style="list-style-type: none"> <li>• Age &gt;60</li> <li>• WT1 mRNA ↑ (post-C)</li> </ul>                                                                             | I: MICE<br>C: ICE (2x) | CR1                   | 8.2 mo                  | NR                   | R1 (4.1 mo post-start WT1/DCs); HAM; no remission; sib allo-HSCT; CR2                    | 11.0 mo / CR2, died (GVHD) |
| 14  | M/50        | AML-nos<br>(M2)/int               | <ul style="list-style-type: none"> <li>• <i>FLT3-ITD</i> mutation</li> <li>• WT1 mRNA ↑ (post-I and post-C)</li> <li>• No sib donor for allo-HSCT</li> </ul>              | I: ICE<br>C: DC (2x)   | CR1                   | 7.7 mo                  | MR                   | Additional WT1/DC vaccines                                                               | 94.0 mo + / CR1, alive     |
| 17  | F/42        | AML-t(8;21)/<br>fav               | <ul style="list-style-type: none"> <li>• WT1 mRNA ↑ (post-I and post-C)</li> <li>• No sib donor for allo-HSCT</li> </ul>                                                  | I: DCE<br>C: DC (2x)   | CR1                   | 8.2 mo                  | MR                   | Additional WT1/DC vaccines; R1 (9.7 mo post-start WT1/DCs); HAM (2x); CR2; MUD allo-HSCT | 89.2 mo + / CR2, alive     |
| 20  | F/68        | AML-mds/<br>int                   | <ul style="list-style-type: none"> <li>• Age &gt;60</li> <li>• MPN (PV) phase pre-AML</li> <li>• PR (10% blasts in bone marrow)</li> <li>• WT1 mRNA ↑ (post-C)</li> </ul> | I: ICE<br>RI: HAM      | PR                    | 4 mo                    | NR                   | Increasing number of blasts in blood from 1.0 mo post-start WT1/DCs; supportive care     | 3.5 mo / PD, died          |
| 21  | M/77        | AML-mds/<br>int                   | <ul style="list-style-type: none"> <li>• Age &gt;60</li> <li>• MDS phase pre-AML</li> <li>• WT1 mRNA ↑ (post-I)</li> </ul>                                                | I: MICE<br>C: ICE      | CR1                   | 5.8 mo                  | SD<br>(11.0 mo)      | Additional WT1/DC vaccines; R1 (31.9 mo post-start WT1/DCs); supportive care             | 44.3 mo / PD, died         |
| 22  | M/55        | AML-nos<br>(M6a)/int              | <ul style="list-style-type: none"> <li>• Erythroleukemia</li> <li>• No sib donor for allo-HSCT</li> </ul>                                                                 | I: DCE<br>C: DC (2x)   | CR1                   | 6.6 mo                  | Undefinable          | Additional WT1/DC vaccines                                                               | 79.8 mo + / CR1, alive     |

**Table S1B. Patient characteristics and clinical response to vaccination with DCs electroporated with mRNA derived from *WT1* construct 2 (“WT1-DC-LAMP group”); for details of the construct, see Figure 1).**

| UPN | Sex/<br>Age | WHO<br>(FAB)/<br>Cytog. risk | Unfavorable prognostic features                                                                                                                                 | Pre-DC<br>treatment                                                  | Status<br>pre-<br>DCs | Time Dx to<br>start DCs                                            | Response<br>category | Treatment post-4 <sup>th</sup> DC vaccination                                                                                                                                                                                                                                                                                                 | OS /<br>Disease<br>status                                                |
|-----|-------------|------------------------------|-----------------------------------------------------------------------------------------------------------------------------------------------------------------|----------------------------------------------------------------------|-----------------------|--------------------------------------------------------------------|----------------------|-----------------------------------------------------------------------------------------------------------------------------------------------------------------------------------------------------------------------------------------------------------------------------------------------------------------------------------------------|--------------------------------------------------------------------------|
| 28  | F/43        | AML-inv(16)/<br>fav          | <ul style="list-style-type: none"> <li>Hyperleukocytosis (WBC 169.10<sup>9</sup>/L)</li> <li>WT1 mRNA ↑ (post-C)</li> <li>No sib donor for allo-HSCT</li> </ul> | I: DCE<br>C: DC (2x)                                                 | CR1                   | 6.8 mo                                                             | NR                   | Additional WT1/DC vaccines; R1 (2.0 mo post-start WT1/DCs); HAM (1x); CR2; MUD allo-SCT                                                                                                                                                                                                                                                       | 77.0 mo + /<br>CR2, alive                                                |
| 29  | F/46        | AML-nos<br>(M1)/int          | <ul style="list-style-type: none"> <li>No sib donor for allo-HSCT</li> </ul>                                                                                    | I: DCE<br>C: DC (2x)                                                 | CR1                   | 7.7 mo                                                             | NR                   | Additional WT1/DC vaccines; R1 (59.8 mo post-start WT1/DCs); HAM, no CR, clofarabine, then MUD allo-SCT                                                                                                                                                                                                                                       | 62.3 mo /<br>R1, died<br>(respiratory<br>failure, lung<br>aspergillosis) |
| 30  | F/72        | AML-nos<br>(M2)/int          | <ul style="list-style-type: none"> <li>Age &gt;60</li> </ul>                                                                                                    | I: MICE<br>C: ICE                                                    | CR1                   | 5.4 mo                                                             | NR                   | Additional WT1/DC vaccines; R1 (7.6 mo post-start WT1/DCs); HAM (1x); CR2 (CRi); R2 (7.5 mo after CR2; 17.2 mo post-start WT1/DCs): supportive care                                                                                                                                                                                           | 17.9 mo /<br>R2, died                                                    |
| 33  | F/72        | AML-nos<br>(M2)/int (+4)     | <ul style="list-style-type: none"> <li>Age &gt;60</li> <li>WT1 mRNA ↑ (post-C)</li> </ul>                                                                       | I: MICE<br>C: ICE (2x)                                               | CR1                   | 6.9 mo                                                             | SD<br>(12.1 mo)      | Additional WT1/DC vaccines; R1 (21.6 mo post-start WT1/DCs) : thioguanine                                                                                                                                                                                                                                                                     | 39.2 mo /<br>PD, died                                                    |
| 34  | M/48        | AML-inv(16)/<br>fav          | <ul style="list-style-type: none"> <li><i>FLT3-ITD</i> mutation at diagnosis</li> <li>Previous relapse</li> <li>No sib donor for allo-HSCT</li> </ul>           | I: 7 cycles of<br>FLAG, 4 of<br>them with<br>GO; CR1;<br>R1: RI: CIA | CR2                   | 4.3 mo post-<br>R1; (18.7<br>mo post-1 <sup>st</sup><br>diagnosis) | NR                   | Additional WT1/DC vaccines; R2 (16.2 mo post-start WT1/DCs); R1: MEC; CR3 (19 mo post-start WT1/DCs); C: C; maintenance with 5-azacitidine                                                                                                                                                                                                    | 68.2 mo + /<br>CR3, alive                                                |
| 35  | M/72        | AML- nos<br>(M5b)/int        | <ul style="list-style-type: none"> <li>Age &gt;60</li> </ul>                                                                                                    | I: MICE<br>C: ICE (2x)                                               | CR1                   | 7.1 mo                                                             | SD**<br>(5.1 mo)     | Additional WT1/DC vaccines; R1 (40.2 mo post-start WT1/DCs); increasing number of blasts in blood from 49.0 mo post-start WT1/DCs); HAM (1x); CR2 (51.8 mo post-start WT1/DCs); R2 (59.8 mo post-start WT1/DCs); mitoxantrone (1x), 1 WT1/DC vaccine, decitabine (2 cycles): no CR; R1: HAM (1x); CR3 (CRi, 67.6 mo post-start WT1/DCs); C: C | 68.7 mo + /<br>CR3, alive                                                |
| 36  | F/66        | AML-nos<br>(M5)/int          | <ul style="list-style-type: none"> <li>Age &gt;60</li> <li><i>FLT3-ITD</i> mutation</li> <li>WT1 mRNA ↑ (post-C)</li> </ul>                                     | I: MICE<br>C: ICE (2x)                                               | CR1                   | 6.6 mo                                                             | NR                   | Only 3 WT1/DC vaccines administered; R1 (0.9 mo post-start WT1/DCs) : HAM (2x); CR2; MUD allo-HSCT; R2 (12.2 mo post-start WT1/DCs): 2 <sup>nd</sup> MUD allo-HSCT; CR3; R3 (24 mo post-start DCs): thioguanine                                                                                                                               | 25.6 mo /<br>R3, died                                                    |
| 38  | F/73        | AML-nos<br>(M0)/int          | <ul style="list-style-type: none"> <li>Age &gt;60</li> <li>WT1 mRNA ↑ (post-I and post-C)</li> </ul>                                                            | I: MICE<br>RI: HAM<br>C: HAM                                         | CR1                   | 7.3 mo                                                             | NR                   | Additional WT1/DC vaccines; R1 (2.1 mo post-start WT1/DCs): supportive care                                                                                                                                                                                                                                                                   | 13.8 mo /<br>R1, died                                                    |

**Table S1C. Patient characteristics and clinical response to vaccination with DCs electroporated with mRNA derived from *WT1* construct 3 (“WT1-DC-LAMP-OPT group”; for details of the construct, see Figure 1).**

### Abbreviations and clarifications, listed according to the columns

**UPN**, unique patient number; \*, the DCs were cultured without keyhole limpet hemocyanin (KLH). **Sex / Age / Cytog. risk**: age at start of WT1/DC vaccination; F, female; M, male; Cytog. risk, cytogenetic risk group (int, intermediate; fav, favorable; adv: adverse; the cytogenetic abnormality found is indicated between parentheses (inv, inversion; t, translocation)). **WHO (FAB) /Cytog. risk**: WHO, World Health Organization classification for AML; FAB, French-American-British classification for AML (indicated for AML not otherwise specified (AML-nos)); AML-mds, AML with myelodysplasia-related changes; AML-nos, AML not otherwise specified; AML-t(8;21), AML with t(8;21) recurrent genetic abnormality; AML-inv(16), AML with inv(16) recurrent genetic abnormality; Cytog. risk: cytogenetic risk group (int, intermediate; fav, favorable; the cytogenetic abnormality is indicated between parentheses for the intermediate risk group, in case the bone marrow karyotype was not normal). **Unfavorable prognostic features**: MDS, myelodysplastic syndrome; ↑, increased above background; post-C, after consolidation chemotherapy; PR, partial hematological remission; post-I, after induction chemotherapy; ITD, internal tandem duplication; hyperleukocytosis, at diagnosis; WBC, white blood cell count; MPN (PV), myeloproliferative neoplasia (polycythemia vera). **Pre-DC treatment**: I: MICE, induction with mitoxantrone + cytarabine + etoposide; C: ICE, consolidation with idarubicin + cytarabine + etoposide; RI: HAM, reinduction with high-dose cytarabine + mitoxantrone; C: HAM, consolidation with HAM; I: DCE, induction with daunorubicin + cytarabine + etoposide; C: DC, consolidation with daunorubicin + cytarabine; I: DC, induction with DC; C: C, consolidation with cytarabine; I: FLAG, fludarabine + cytarabine; GO, gemtuzumab ozogamicin; RI: CIA, reinduction after 1<sup>st</sup> early relapse with clofarabine + idarubicin + cytarabine; RI: MEC, reinduction after 2<sup>nd</sup> relapse with mitoxantrone + etoposide + cytarabine. **Status pre-DC**: CR1, 1<sup>st</sup> complete remission; PR, partial remission; CR2, 2<sup>nd</sup> CR. **Time Dx to start DCs**: time from diagnosis to the start of DC vaccination (mo, months). **Response category**: MR, molecular remission; PR→CR, conversion of partial into complete hematological remission by WT1/DCs alone; NR, non-responder; SD, stable disease; \*\*patient UPN35 showed 5% blasts in the bone marrow 40.2 mo after the start of DC vaccination and relapsed molecularly (with an increase above background of blood *WT1* transcript levels), while he was on bimonthly DC vaccination with the *WT1-DC-LAMP-OPT* construct. The rhythm of DC vaccinations was increased to biweekly, upon which the patient had to undergo a new apheresis for the production of new DC vaccines, which were electroporated with the wild type *WT1* construct. The SD phase occurred during the biweekly injection of both types of vaccines (2 months for the *WT1-DC-LAMP-OPT* construct and 3 months for the *WT1* construct). Control marrow examinations showed 4.6% and 14.6% blasts, respectively, 45.3 mo and 49 mo after the start of DC vaccination and, respectively, 3.6 mo after the start and 2.3 mo after the end of the SD period (which lasted 5.1 mo). **Treatment post-4<sup>th</sup> DC vaccination**: R, relapse (R1, 1<sup>st</sup>; R2, 2<sup>nd</sup>; R3, 3<sup>rd</sup>); allo-HSCT, allogeneic hematopoietic stem cell transplantation; MUD, matched unrelated donor; CRi, CR with incomplete blood count recovery. **OS / Disease status**: OS, overall survival (as of December 31, 2016) from the start of DC vaccination; PD, progressive disease; VOD, veno-occlusive disease; GVHD, graft-vs-host disease.

| UPN    | % WT1 <sub>37-45</sub><br>tetramer <sup>+</sup><br>CD8 <sup>+</sup> T-cells |              | % WT1 <sub>126-134</sub><br>tetramer <sup>+</sup><br>CD8 <sup>+</sup> T-cells |              | % WT1 <sub>187-195</sub><br>tetramer <sup>+</sup><br>CD8 <sup>+</sup> T-cells |              | % WT1 <sub>235-243</sub><br>tetramer <sup>+</sup><br>CD8 <sup>+</sup> T-cells |       |
|--------|-----------------------------------------------------------------------------|--------------|-------------------------------------------------------------------------------|--------------|-------------------------------------------------------------------------------|--------------|-------------------------------------------------------------------------------|-------|
|        | Pre                                                                         | Post         | Pre                                                                           | Post         | Pre                                                                           | Post         | Pre                                                                           | Post  |
| UPN17  | 0.190                                                                       | 0.160        | 0.370                                                                         | 0.190        | 0.210                                                                         | 0.140        | 0.420                                                                         | 0.380 |
| UPN28  | 0.150                                                                       | 0.140        | 0.100                                                                         | 0.110        | 0.140                                                                         | 0.110        | NE                                                                            | NE    |
| UPN30  | 0.043                                                                       | <u>0.084</u> | 0.058                                                                         | <u>0.119</u> | 0.033                                                                         | <u>0.069</u> | NE                                                                            | NE    |
| UPN34  | 0.026                                                                       | <u>0.044</u> | 0.068                                                                         | 0.074        | 0.040                                                                         | 0.044        | NE                                                                            | NE    |
| UPN35* | 0.019                                                                       | <u>0.090</u> | 0.025                                                                         | <u>0.139</u> | 0.020                                                                         | 0.029        | NE                                                                            | NE    |
| UPN38  | 0.101                                                                       | 0.056        | 0.122                                                                         | 0.068        | 0.107                                                                         | 0.069        | NE                                                                            | NE    |
| UPN47  | 0.010                                                                       | 0.006        | 0.055                                                                         | 0.018        | 0.057                                                                         | <u>0.590</u> | 0.126                                                                         | 0.034 |

UPN, unique patient number; Pre, pre-DC vaccination; Post, post-4th DC vaccination; \*, long-term responder; the values underlined represent a >1.5-fold increase in tetramer<sup>+</sup> CD8<sup>+</sup> T-cells; NE, not evaluable or not done. The values for long-term responders UPN01 and UPN08 and non-(long-term) responders UPN05, UPN09 and UPN16 can be found in reference 17; these data were included in the statistical evaluation of the correlation between long-term clinical response and poly-epitope WT1-specific tetramer<sup>+</sup> CD8<sup>+</sup> T-cells.

**Table S2. Pre- and post-DC vaccination WT1-specific tetramer<sup>+</sup> CD8<sup>+</sup> T-cell frequencies in the blood of HLA-A\*0201<sup>+</sup> AML patients.**
